1

2

3 **Medical students in distress: a mixed methods approach to understanding the impact of**  
4 **debt on well-being**

5

6 Adrienne Yang<sup>1\*</sup>¶, Simone Langness<sup>2</sup>¶, Lara Chehab<sup>1</sup>¶, Nikhil Rajapuram<sup>3</sup>, Li Zhang<sup>4</sup>, Amanda

7 Sammann<sup>1</sup>

8

9

10 <sup>1</sup>Department of Surgery, University of California, San Francisco, CA

11 <sup>2</sup>Department of Trauma Surgery, Sharp HealthCare, San Diego, CA

12 <sup>3</sup>Department of Pediatrics, Stanford University, Stanford, CA

13 <sup>4</sup>Department of Epidemiology and Biostatistics, University of California, San Francisco, CA

14

15 \*Corresponding author

16 E-mail: [adrienne.yang@ucsf.edu](mailto:adrienne.yang@ucsf.edu)

17

18 ¶These authors contributed equally to this work.

## 19 **Abstract**

20 **Background:** Nearly three in four U.S. medical students graduate with debt in six-figure  
21 dollar amounts which impairs students emotionally and academically and impacts their career  
22 choices and lives long after graduation. Schools have yet to develop systems-level solutions to  
23 address the impact of debt on students' well-being. The objectives of this study were to identify  
24 students at highest risk for debt-related stress, define the impact on medical students' well-being,  
25 and to identify opportunities for intervention.

26 **Methods:** This was a mixed methods, cross-sectional study that used quantitative survey  
27 analysis and human-centered design (HCD). We performed a secondary analysis on a national  
28 multi-institutional survey on medical student wellbeing, including univariate and multivariate  
29 logistic regression, a comparison of logistic regression models with interaction terms, and  
30 analysis of free text responses. We also conducted semi-structured interviews with a sample of  
31 medical student respondents and non-student stakeholders to develop insights and design  
32 opportunities.

33 **Results:** Independent risk factors for high debt-related stress included pre-clinical year (OR  
34 1.75), underrepresented minority (OR 1.40), debt \$20-100K (OR 4.85), debt >\$100K (OR  
35 13.22), private school (OR 1.45), West Coast region (OR 1.57), and consideration of a leave of  
36 absence for wellbeing (OR 1.48). Mental health resource utilization ( $p= 0.968$ ) and counselors  
37 ( $p= 0.640$ ) were not protective factors against debt-related stress. HCD analysis produced 6 key

38 insights providing additional context to the quantitative findings, and associated opportunities for  
39 intervention.

40 **Conclusions:** We used an innovative combination of quantitative survey analysis and in-  
41 depth HCD exploration to develop a multi-dimensional understanding of debt-related stress  
42 among medical students. This approach allowed us to identify significant risk factors impacting  
43 medical students experiencing debt-related stress, while providing context through stakeholder  
44 voices to identify opportunities for system-level solutions.

45

46

47

48

49

50

51

52

53

54

55

## 56 **Introduction**

57 Over the past few decades, it has become increasingly costly for aspiring physicians to  
58 attend medical school and pursue a career in medicine. Most recent data shows that 73% of  
59 medical students graduate with debt often amounting to six-figures<sup>1</sup> – an amount that is steadily  
60 increasing every year.<sup>2</sup> In 2020, the median cost of a four-year medical education in the United  
61 States (U.S.) was \$250,222 for public and \$330,180 for private school students<sup>1</sup> – a price that  
62 excludes collateral costs such as living, food, and lifestyle expenses. To meet these varied costs,  
63 students typically rely on financial support from their families, personal means, scholarships, or  
64 loans. Students are thereby graduating with more debt than ever before and staying indebted for  
65 longer, taking 10 to 20 years to repay their student loans regardless of specialty choice or  
66 residency length.<sup>1</sup>

67 Unsurprisingly, higher debt burden has been negatively correlated with generalized  
68 severe distress among medical students,<sup>3,4</sup> in turn jeopardizing their academic performance and  
69 potentially impacting their career choices.<sup>5</sup> Studies have found that medical students with higher  
70 debt relative to their peers were more likely to choose a specialty with a higher average annual  
71 income,<sup>5</sup> less likely to plan to practice in underserved locations, and less likely to choose primary  
72 care specialties.<sup>4</sup> However, a survey of 2019 graduating medical students from 142 medical  
73 schools found that, when asked to rank factors that influenced their specialty choice, students  
74 ranked economic factors, including debt and income, at the bottom of the list. With this  
75 inconsistency in the literature, authors Youngclaus and Fresne declare that further studies and  
76 analysis are required to better understand this important relationship.<sup>1</sup>

77           Unfortunately, debt and its negative effects disproportionately impact underrepresented  
78 minority (URM) students, including African Americans, Hispanic Americans, American Indian,  
79 Native Hawaiian, and Alaska Native,<sup>6</sup> who generally have more debt than students who are  
80 White or Asian American.<sup>1</sup> In 2019, among medical school graduates who identified as Black,  
81 91% reported having education debt, in comparison to the 73% reported by all graduates.<sup>1</sup>  
82 Additionally, Black medical school graduates experience a higher median education debt amount  
83 relative to other groups of students, with a median debt of \$230,000.<sup>1</sup> This inequitable  
84 distribution of debt disproportionately places financial-related stress on URM students,<sup>7</sup>  
85 discouraging students from pursuing a medical education.<sup>8</sup> These deterring factors can lead to a  
86 physician workforce that lacks diversity and compromises health equity outcomes.<sup>9</sup>

87           Limited literature exists to identify the impact of moderating variables on the relationship  
88 between debt and debt-related stress. Financial knowledge is found to be a strong predictor of  
89 self-efficacy and confidence in students' financial management, leading to financial optimism  
90 and potentially alleviating debt stress.<sup>10-12</sup> Numerous studies list mindfulness practices, exercise,  
91 and connecting with loved ones as activities that promote well-being and reduce generalized  
92 stress among students.<sup>13-15</sup> However, to date, no studies have examined whether these types of  
93 stress-reducing activities, by alleviating generalized stress, reduce debt-related stress. Studies  
94 have not examined whether resources such as physician role models may act as a protective  
95 factor against debt-related stress.

96           Despite the growing recognition that debt burdens medical students emotionally and  
97 academically, we have yet to develop systemic solutions that target students' unmet needs in this  
98 space. We performed the first multi-institutional national study on generalized stress among

99 medical students, and found that debt burden was one of several risk factors for generalized  
100 stress among medical students.<sup>3</sup> The goal of this study is to build upon our findings by using a  
101 mixed methods approach combining rigorous survey analysis and human-centered design to  
102 develop an in-depth understanding of the impact that education debt has on medical students'  
103 emotional and academic well-being and to identify opportunities for intervention.

## 104 **Methods**

105 We conducted a mixed methods, cross-sectional study that explored the impact of debt-  
106 related stress on US medical students' well-being and professional development. This study was  
107 conducted at the University of California, San Francisco (UCSF). All activities were approved  
108 by the UCSF institutional review board. We performed a secondary analysis of the quantitative  
109 and qualitative results of the Medical Student Wellbeing Survey (MSWS), a national multi-  
110 institutional survey on medical student wellbeing administered between 2019-2020, to determine  
111 risk factors and moderating variables of debt-related stress. To further explore these variables,  
112 we used human-centered design (HCD), an approach to problem-solving that places users at the  
113 center of the research process in order to determine key pain points and unmet needs, and co-  
114 design solutions tailored to their unique context.<sup>16</sup> In this study, we performed in-depth, semi-  
115 structured interviews with a purposefully sampled cohort of medical students and a convenience  
116 sample of non-student stakeholders to determine key insights representing students' unmet  
117 needs, and identified opportunities to ameliorate the impact of debt-related stress on medical  
118 students.

## 119 **Quantitative Data: The Medical Student Wellbeing Survey**

120 The MSWS is a survey to assess medical student wellbeing that was administered from  
121 September 2019 to February 2020 to medical students actively enrolled in accredited US or  
122 Caribbean medical schools.<sup>3</sup> Respondents of the MSWS represent a national cohort of >3,000  
123 medical students from >100 unique medical school programs. The MSWS utilizes a combination  
124 of validated survey questions, such as the Medical Student Wellbeing Index (MS-WBI), and  
125 questions based on foundations established from previously validated wellbeing survey  
126 methods.<sup>3</sup> Questions generally focused on student demographics, sources of stress during  
127 medical school, specialty consideration, and frequency in activities that promote wellbeing.  
128 Some questions ask students to rate physical, emotional, and social domains of wellbeing using a  
129 five-point Likert scale. Questions of interest from the MSWS included debt-related stress,  
130 generalized stress, intended specialty choice, and utilization of well-being resources and  
131 counselors. An additional variable investigated was average school tuition, which was  
132 determined by a review of publicly available data for each student's listed medical school.<sup>17</sup>

### 133 **Stress: Debt-Related and Generalized Stress**

134 Debt stress was assessed by the question, "How does financial debt affect your stress  
135 level?" Students responded using a five-point Likert scale from -2 to 2: significant increase in  
136 stress (-2), mild increase (-1), no change (0), mild decrease (1), or significant decrease (2).  
137 Responses for this question were evaluated as a binary index of 'high debt stress,' defined as a  
138 response of -2, versus 'low debt stress,' defined as a response of -1 or 0. In addition, generalized  
139 stress from the MSWS was assessed by questions from the embedded MS-WBI, which produced  
140 a score. Previous studies have shown that the score can be used to create a binary index of

141 distress: a score  $\geq$  has been associated with severe distress, and a score  $<4$  has been associated  
142 with no severe distress.<sup>18</sup>

### 143 **Intended Specialty**

144 We categorized students' responses to intended specialty choice by competitiveness,  
145 using the 2018 National Resident Match Program data.<sup>19</sup> 'High' and 'low' competitiveness were  
146 defined as an average United States Medical Licensing Examination (USMLE) Step 1 score of  
147  $>240$  or  $\leq 230$ , respectively, or if  $>18\%$  or  $<4\%$  of applicants were unmatched, respectively.  
148 'Moderate' competition was defined as any specialty not meeting criteria for either 'high' or  
149 'low' competitiveness.

### 150 **Resource Utilization**

151 The MSWS assessed utilization of well-being resources by the question, "At your  
152 institution, which of the following well-being resources have you utilized? (Select all that  
153 apply)" Students responded by selecting each of the resource(s) they used: Mental Health and  
154 Counseling Services, Peer Mentorship, Self-Care Education, Mindfulness/Meditation Classes,  
155 Community Building Events, and Other. The number of choices that the student selected was  
156 calculated, allowing for placement into a category depending on the amount of resource  
157 utilization: 0-20%, 20-40%, 40-60%, 60-80%, 80-100%. Responses for this question were  
158 evaluated as a binary index of 'high resource utilization,' defined as a response of 80-100%  
159 resource utilization, versus 'low resource utilization,' defined as a response of  $<80\%$  resource  
160 utilization. Additionally, use of a counselor for mental health support was assessed by the  
161 question, "Which of the following activities do you use to cope with difficult situations (or a



162 difficult day on clinical rotation)? (Select all that apply)” Students responded by selecting the  
163 activities that they use from a list, which included: Listen to Music, Mindfulness Practice, Meet  
164 with a Counselor, Exercise, etc. Responses for this question were evaluated as a binary index of  
165 ‘Meeting with a Counselor,’ defined by selection of that option, versus ‘Not Meeting with a  
166 Counselor,’ defined as not selecting that option.

## 167 **Quantitative Data Analysis**

168 We performed a secondary analysis of quantitative data from the MSWS to calculate  
169 frequencies and odds ratios for the five quantitative variables described above (debt-related  
170 stress, generalized stress, intended specialty, resource utilization, and school tuition). Univariate  
171 analysis and multivariate logistic regression were performed among students in the high debt  
172 stress (-2) and low debt stress (0 or -1) for select variables, such as clinical phase, URM, debt  
173 burden, specialty competitiveness, and average school tuition among others to identify risk  
174 factors for high debt stress. To determine if ‘high resource utilization’ or ‘meeting with a  
175 counselor’ were moderating variables on the relationship between debt burden and debt stress,  
176 we applied the logistic regression with the interaction terms of ‘debt’ and ‘resource utilization’  
177 (high vs. low). Then, we performed a similar analysis but replaced the interaction term with  
178 ‘debt’ and ‘meeting with a counselor’ (yes vs. no). We also performed Chi-squared tests to  
179 determine the degree to which severe distress increases as debt burden increases, if specialty  
180 competitiveness varied by debt stress, and if the proportion of students who identified as URM,  
181 in comparison to non-URM, differed by debt level. All statistical tests were two-sided and p

182 <0.05 was considered significant. Statistical analyses were performed using SAS version 9.4 and  
183 R version 4.0.5.

## 184 **Qualitative Data: Interviews and MSWS Free Text Responses**

### 185 **Free-Text Entries**

186 At the conclusion of the 2019-2020 MSWS, respondents had unlimited text space to  
187 provide comments to two prompts. The first prompt read, "What well-being resource(s), if  
188 offered at your school, do you feel would be most useful?" The second prompt read "If you have  
189 any further comments to share, please write them below." Answers to either prompt that  
190 pertained to debt, cost of medical school, or finances were extracted for the purpose of this study  
191 and analyzed with the other qualitative data subsequently described.

### 192 **Interview Selection & Purposive Sampling**

193 Interview participants were identified from a repository of respondents to the MSWS  
194 who had attached their email address and expressed willingness at the time of the survey to be  
195 contacted for an interview.<sup>3</sup> Our recruitment period was between April 19, 2021 to July 2, 2021.  
196 The recruitment process involved sending invitations to all of the email addresses in the list to  
197 participate in a 45-minute interview on the topic of student debt and wellbeing. The invitation  
198 included a brief screening questionnaire asking students to report updates to questions that were  
199 previously asked in the MSWS (i.e.: clinical training year, marital status, dependents).  
200 Additional novel questions included primary financial support system, estimate of financial  
201 support systems' household income in the last year, estimate of educational financial debt at

202 conclusion of medical school, student's plan for paying off debt, and degree of stress (using a  
203 Likert scale from 0-10) over current and future education debt.

204 Purposeful sampling of medical student stakeholders for interviews allowed us to  
205 maximize heterogeneity. We utilized the students' responses to the brief screening questionnaire  
206 with their corresponding responses to demographic questions from the MSWS to select  
207 interviewees that varied by gender, race, presence of severe distress, type of medical school  
208 (public vs. private), region of school, and tuition level of school. The sampling ensured a diverse  
209 representation, in accordance with HCD methodology.<sup>20</sup> Brief descriptions of participant  
210 experiences are listed in **Table 2** ("Interviewee Descriptors"). Students who were selected for  
211 interviews were sent a confirmation email to participate. In addition, to include representation  
212 from the entire ecosystem, we interviewed a financial aid counselor at a medical school and a  
213 pre-medical student, chosen through convenience sampling. We directly contacted those two  
214 individuals for interviews.

## 215 **Semi-Structured Interviews**

216 All interviews were conducted between April 2021 and July 2021 over Zoom, a  
217 collaborative, cloud-based videoconferencing service offering secure audio recordings of  
218 sessions. A single researcher conducted interviews over an average of 45 minutes. Informed  
219 consent was obtained verbally from participants prior to interviews; interviews and their  
220 recordings only proceeded following verbal consent. The interview guide (S1 File) included  
221 open-ended questions about students' experience of debt-related stress and their reflections on its  
222 consequences. The audio recordings were transcribed using Otter.ai, a secure online transcription

223 service that converts audio files to searchable text files. Interview responses were redacted to  
224 preserve anonymity of respondent identity.

## 225 **Qualitative Data Analysis**

226 Interview data was analyzed using a general inductive approach to thematic analysis.  
227 Specifically, two researchers (SL and AY) independently inductively analyzed transcripts from  
228 the first three semi-structured interviews to come up with themes relating to the experiences and  
229 consequences of debt-related stress. They reconciled discrepancies in themes through discussion  
230 to create the codebook (S2 File), which included 18 themes. SL and AY independently coded  
231 each subsequent interview transcript as well as the free text responses from the survey, meeting  
232 to reach a consensus on representative quotes for applicable themes.

233 The two researchers met with the core research team to extrapolate ‘insight statements’  
234 from the themes that emerged from the thirteen interviews, deducing unique human perspectives,  
235 motivations, or tensions from the thematic data following the HCD methodology.<sup>21</sup> These insight  
236 statements articulate key challenges experienced by stakeholders, and provide the basis for  
237 design opportunities that lead to collaborative co-design processes for solution development. In  
238 HCD, design opportunities are statements derived directly from the insight and are framed in a  
239 way that suggest that multiple solutions are possible. These design opportunities are used during  
240 brainstorming sessions, where creativity and innovation are encouraged in the co-design  
241 process.<sup>22</sup>

## 242 **Results**

243 **MSWS Respondents and Quantitative Analysis**

244 A total of 3,162 students responded to the MSWS and their sociodemographic  
 245 characteristics have been described previously.<sup>3</sup> A total of 2,771 respondents (87.6%) provided  
 246 responses for our study’s variables of interest, including a response for ‘high debt stress’ (-2) or  
 247 ‘low debt stress’ (-1 or 0). **Table 1** lists the distribution of debt-related stress across different  
 248 variables for all respondents.

249 **Table 1. Summary statistics of debt stress level for different variables (N=3,162)**

|                 |              | <b>Reported Level of Stress (Likert Scale) Associated with Medical School Debt</b> |                                            |                                     |                                |                                    |                                           |
|-----------------|--------------|------------------------------------------------------------------------------------|--------------------------------------------|-------------------------------------|--------------------------------|------------------------------------|-------------------------------------------|
|                 |              | <b>N (%)</b>                                                                       |                                            |                                     |                                |                                    |                                           |
| <b>Variable</b> |              | <b>Overall</b>                                                                     | <b>Significant increase in stress (-2)</b> | <b>Mild increase in stress (-1)</b> | <b>No change in stress (0)</b> | <b>Mild decrease in stress (1)</b> | <b>Significant decrease in stress (2)</b> |
|                 |              | 3,162                                                                              | 595                                        | 1,201                               | 975                            | 69                                 | 123                                       |
| MS Year         | Pre-Clinical | 1636 (51.7)                                                                        | 317 (53.3)                                 | 643 (53.5)                          | 503 (51.6)                     | 40 (58.0)                          | 47 (38.2)                                 |
|                 | Clinical     | 641 (20.3)                                                                         | 124 (20.8)                                 | 246 (20.5)                          | 191 (19.6)                     | 17 (24.6)                          | 25 (20.3)                                 |

|                |                      |                |               |                |               |             |             |
|----------------|----------------------|----------------|---------------|----------------|---------------|-------------|-------------|
|                | Gap                  |                |               |                |               |             |             |
|                | Year/Other           | 176<br>(5.6)   | 32<br>(5.4)   | 52 (4.3)       | 50<br>(5.1)   | 5<br>(7.2)  | 11<br>(8.9) |
|                | Post-Clinical        | 709<br>(22.4)  | 122<br>(20.5) | 260<br>(21.6)  | 231<br>(23.7) | 7<br>(10.1) | 40 (32.5)   |
| Gender         | Male                 | 1043<br>(33.0) | 185<br>(31.1) | 390<br>(32.5)  | 344<br>(35.4) | 29 (42.0)   | 46 (37.4)   |
|                | Non-Male             | 2043<br>(64.6) | 410<br>(68.9) | 811<br>(67.5)  | 629<br>(64.6) | 40 (58.0)   | 77 (62.6)   |
|                | NA <sup>a</sup>      | 76<br>(2.4)    | 0<br>(0.0)    | 0<br>(0.0)     | 2<br>(0.2)    | 0<br>(0.0)  | 0<br>(0.0)  |
| Marital Status | Never Married        | 2690<br>(85.1) | 509<br>(85.5) | 1041<br>(86.9) | 861<br>(88.3) | 66 (95.7)   | 108 (87.8)  |
|                | Divorced/<br>Widowed | 21<br>(0.7)    | 6<br>(1.0)    | 10<br>(0.8)    | 3<br>(0.3)    | 0<br>(0.0)  | 0<br>(0.0)  |
|                | Married              | 374<br>(11.8)  | 80<br>(13.4)  | 147<br>(12.3)  | 111<br>(11.4) | 3<br>(4.3)  | 15 (12.2)   |
|                | NA                   | 77<br>(2.4)    | 0<br>(0.0)    | 3<br>(0.2)     | 0<br>(0.0)    | 0<br>(0.0)  | 0<br>(0.0)  |
| Disability     | No                   | 2758<br>(87.2) | 530<br>(90.0) | 1068<br>(90.7) | 883<br>(92.1) | 62 (92.5)   | 106 (89.1)  |

|                              |           |        |        |        |        |           |            |
|------------------------------|-----------|--------|--------|--------|--------|-----------|------------|
|                              |           | 277    | 59     | 110    | 76     | 5         |            |
|                              | Yes       | (8.8)  | (10.0) | (9.3)  | (7.9)  | (7.5)     | 13 (10.9)  |
|                              |           | 127    | 6      | 23     | 16     | 2         | 4          |
|                              | NA        | (4.0)  | (1.0)  | (1.9)  | (1.6)  | (2.9)     | (3.3)      |
| URM <sup>b</sup>             | No        | 2667   | 484    | 1037   | 870    |           |            |
|                              |           | (84.3) | (84.6) | (87.9) | (91.8) | 63 (91.3) | 112 (92.6) |
|                              |           | 342    | 88     | 143    | 78     | 6         | 9          |
|                              | Yes       | (10.8) | (15.4) | (12.1) | (8.2)  | (8.7)     | (7.4)      |
|                              |           | 153    | 23     | 21     | 27     | 0         | 2          |
|                              | NA        | (4.8)  | (3.9)  | (1.7)  | (2.8)  | (0.0)     | (1.6)      |
| Debt Burden                  | <\$20K    | 923    | 37     | 166    | 525    |           |            |
|                              |           | (29.2) | (6.4)  | (14.5) | (59.4) | 45 (67.2) | 113 (95.0) |
|                              |           | 940    | 185    | 485    | 214    |           | 5          |
|                              | \$20-100K | (29.7) | (31.8) | (42.4) | (24.2) | 14 (20.9) | (4.2)      |
|                              |           | 1044   | 359    | 493    | 145    |           | 1          |
|                              | >\$100K   | (33.0) | (61.8) | (43.1) | (16.4) | 8 (11.9)  | (0.8)      |
|                              |           | 255    | 14     | 57     | 91     | 2         | 4          |
|                              | NA        | (8.1)  | (2.4)  | (4.7)  | (9.3)  | (2.9)     | (3.3)      |
| Specialty<br>Competitiveness |           |        |        |        |        |           |            |
|                              |           | 1464   | 270    | 561    | 478    |           |            |
|                              | Low       | (46.3) | (46.6) | (47.5) | (49.8) | 28 (40.6) | 68 (55.7)  |

|                       |                                 |                |               |                |               |            |             |
|-----------------------|---------------------------------|----------------|---------------|----------------|---------------|------------|-------------|
|                       | Moderate                        | 1077<br>(34.1) | 234<br>(40.4) | 428<br>(36.3)  | 323<br>(33.7) | 23 (33.3)  | 33 (27.0)   |
|                       | High                            | 490<br>(15.5)  | 75<br>(13.0)  | 191<br>(16.2)  | 158<br>(16.5) | 18 (26.1)  | 21 (17.2)   |
|                       | NA                              | 131<br>(4.1)   | 16<br>(2.7)   | 21<br>(1.7)    | 16<br>(1.6)   | 0<br>(0.0) | 1<br>(0.8)  |
| Specialty<br>Category | Surgical                        | 465<br>(14.7)  | 87<br>(15.0)  | 180<br>(15.3)  | 146<br>(15.2) | 19 (27.5)  | 12<br>(9.8) |
|                       | Medical                         | 1581<br>(50.0) | 292<br>(50.4) | 603<br>(51.1)  | 519<br>(54.1) | 30 (43.5)  | 72 (59.0)   |
|                       | Mixed<br>(Surgical/<br>Medical) | 985<br>(31.2)  | 200<br>(34.5) | 397<br>(33.6)  | 294<br>(30.7) | 20 (29.0)  | 38 (31.1)   |
|                       | NA                              | 131<br>(4.1)   | 16<br>(2.7)   | 21<br>(1.7)    | 16<br>(1.6)   | 0<br>(0.0) | 1<br>(0.8)  |
| Degree Type           | MD                              | 3015<br>(95.4) | 554<br>(93.1) | 1145<br>(95.7) | 949<br>(97.7) | 68 (98.6)  | 117 (96.7)  |
|                       | DO                              | 131<br>(4.1)   | 41<br>(6.9)   | 52<br>(4.3)    | 22<br>(2.3)   | 1<br>(1.4) | 4<br>(3.3)  |
|                       | NA                              | 16<br>(0.5)    | 0<br>(0.0)    | 4<br>(0.3)     | 4<br>(0.4)    | 0<br>(0.0) | 2<br>(1.6)  |



|           |                 |        |        |        |        |           |           |
|-----------|-----------------|--------|--------|--------|--------|-----------|-----------|
| School    |                 | 1633   | 320    | 594    | 495    |           |           |
| Category  | Private         | (51.6) | (53.8) | (49.6) | (51.0) | 39 (56.5) | 71 (58.7) |
|           | Public          | 1513   | 275    | 603    | 476    |           |           |
|           |                 | (47.8) | (46.2) | (50.4) | (49.0) | 30 (43.5) | 50 (41.3) |
|           | NA              | 16     | 0      | 4      | 4      | 0         | 2         |
|           |                 | (0.5)  | (0.0)  | (0.3)  | (0.4)  | (0.0)     | (1.6)     |
| Region    | Northeast       | 1175   | 202    | 430    | 387    |           |           |
|           |                 | (37.2) | (33.9) | (35.9) | (39.9) | 27 (39.1) | 52 (43.0) |
|           | West            | 816    | 171    | 299    | 248    |           |           |
|           | Coast           | (25.8) | (28.7) | (25.0) | (25.5) | 20 (29.0) | 27 (22.3) |
|           | Non-            | 1155   | 222    | 468    | 336    |           |           |
|           | Coastal         | (36.5) | (37.3) | (39.1) | (34.6) | 22 (31.9) | 42 (34.7) |
|           | NA              | 16     | 0      | 4      | 4      | 0         | 2         |
|           |                 | (0.5)  | (0.0)  | (0.3)  | (0.4)  | (0.0)     | (1.6)     |
| City      | Non-            |        |        |        |        |           |           |
| Character | Metropolit      | 1442   | 282    | 559    | 431    |           |           |
|           | an <sup>c</sup> | (45.6) | (47.6) | (46.8) | (44.4) | 25 (36.2) | 55 (45.5) |
|           | Metropolit      | 1698   | 310    | 635    | 540    |           |           |
|           | an <sup>d</sup> | (53.7) | (52.4) | (53.2) | (55.6) | 44 (63.8) | 66 (54.5) |
|           | NA              | 22     | 3      | 7      | 4      | 0         | 2         |
|           |                 | (0.7)  | (0.5)  | (0.6)  | (0.4)  | (0.0)     | (1.6)     |

|             |            |        |        |        |        |           |           |
|-------------|------------|--------|--------|--------|--------|-----------|-----------|
| School      |            |        |        |        |        |           |           |
| Average     |            | 425    | 66     | 155    | 144    |           |           |
| Tuition     | <\$40K     | (13.4) | (11.3) | (13.1) | (15.0) | 15 (21.7) | 27 (22.3) |
|             | \$40 -     | 1955   | 379    | 759    | 607    |           |           |
|             | \$60K      | (61.8) | (65.0) | (64.3) | (63.2) | 38 (55.1) | 63 (52.1) |
|             | >\$60K     | 724    | 138    | 266    | 210    |           |           |
|             |            | (22.9) | (23.7) | (22.5) | (21.9) | 16 (23.2) | 31 (25.6) |
|             |            | 58     | 12     | 21     | 14     | 0         | 2         |
|             | NA         | (1.8)  | (2.0)  | (1.7)  | (1.4)  | (0.0)     | (1.6)     |
| Leave of    | Never      |        |        |        |        |           |           |
| Absence for | Considered | 2329   | 430    | 950    | 797    |           |           |
| Wellbeing   |            | (73.7) | (72.4) | (79.3) | (82.0) | 57 (82.6) | 91 (74.0) |
|             | Considered | 518    | 134    | 202    | 142    |           |           |
|             |            | (16.4) | (22.6) | (16.9) | (14.6) | 10 (14.5) | 30 (24.4) |
|             | Have       | 113    | 30     | 46     | 33     | 2         | 2         |
|             | Taken      | (3.6)  | (5.1)  | (3.8)  | (3.4)  | (2.9)     | (1.6)     |
|             |            | 202    | 1      | 3      | 3      | 0         | 0         |
|             | NA         | (6.4)  | (0.2)  | (0.2)  | (0.3)  | (0.0)     | (0.0)     |

250 <sup>a</sup> NA= not available

251 <sup>b</sup> URM= underrepresented minority

252 <sup>c</sup> Non-Metropolitan: includes urban cluster, small urban area, medium-size urban area

253 <sup>d</sup> Metropolitan: includes large metropolitan, metropolitan

254 **Table 2. Interviewee Descriptors**

|                          |    | Summary of Interviewees                                                                                                                                  |
|--------------------------|----|----------------------------------------------------------------------------------------------------------------------------------------------------------|
| Student Stakeholders     | 1  | 2nd-year male student with high debt stress, who is married and pursuing a highly competitive specialty                                                  |
|                          | 2  | 2nd-year female student with low debt stress, who comes from a low-income background with receives financial support                                     |
|                          | 3  | Gap year (PhD years of MD/PhD program) female student with low debt stress, who comes from a wealthy background and is pursuing a lower paying specialty |
|                          | 4  | 2nd-year female immigrant student with high debt stress, pursuing a lower paying specialty and a career of advocacy                                      |
|                          | 5  | 3rd-year female student with low debt stress, who is married and receives financial support                                                              |
|                          | 6  | 4th-year female student with low debt stress, who identifies as URM and is graduating debt-free due to financial aid                                     |
|                          | 7  | 3rd-year male student with low debt stress, who is enrolled in an MD/PhD program and is receiving financial support from his fiancée                     |
|                          | 8  | 4th-year male student with low debt stress, who took out loans and is pursuing a higher paying specialty                                                 |
|                          | 9  | 2nd-year female student with low debt stress, who took out loans and is enrolled in a 7-year medical program (including college and medical school)      |
|                          | 10 | 1st-year female student with low debt stress, who receives scholarships for medical school and whose parent is a physician                               |
|                          | 11 | 1st-year female immigrant student with low debt stress, who identifies as URM and is pursuing a lower paying specialty                                   |
| Non-Student Stakeholders | 12 | Pre-medical female student with high debt stress, who identifies as a "career changer" and is enrolled in a postbaccalaureate program                    |
|                          | 13 | Medical school financial aid counselor                                                                                                                   |

256 **Risk Factors for Debt-Related Stress**

257 Factors that were independently associated with higher debt-related stress included being in pre-  
 258 clinical year (OR 1.75, 95% CI 1.30-2.36, p<0.001), identifying as URM (OR 1.40, 95% CI  
 259 1.03-1.88), p=0.029), having debt \$20-100K (OR 4.85, 95% CI 3.32-7.30, p<0.001), debt >100K  
 260 (OR 13.22, 95% CI 9.05-19.90, p<0.001), attending a private medical school (OR 1.45, 95% CI  
 261 1.06-1.98, p=0.019), attending medical school on the West Coast (OR 1.57, 95% CI 1.17-2.13,  
 262 p=0.003), and having considered taking a leave of absence for wellbeing (OR 1.48, 95% CI 1.13-  
 263 1.93, p=0.004) (Table 3, S1 Table).

264 **Table 3. Predictors of high debt stress in medical students using a multivariable logistic**  
 265 **regression model (N=2,771)**

|                                           | Univariate Analysis    |         | Multivariate Analysis  |          |
|-------------------------------------------|------------------------|---------|------------------------|----------|
|                                           | Odds Ratio<br>(95% CI) | P-Value | Odds Ratio<br>(95% CI) | P-Value  |
| <b>Medical School Year (vs. Clinical)</b> |                        |         |                        |          |
| Pre-clinical                              | 0.97 (0.77-1.24)       | p=0.832 | 1.75 (1.30-2.36)       | p<0.001* |
| Gap Year/Other                            | 1.11 (0.70-1.71)       | p=0.658 | 1.09 (0.63-1.86)       | p=0.748  |
| Post-clinical                             | 0.88 (0.66-1.16)       | p=0.355 | 0.85 (0.62-1.17)       | p=0.310  |

|                                             |                        |              |                        |          |
|---------------------------------------------|------------------------|--------------|------------------------|----------|
| <b>Gender (vs. Male)</b>                    |                        |              |                        |          |
| Non-Male                                    | 1.13 (0.93-1.37)       | p=0.221      | 1.22 (0.97-1.53)       | p=0.085  |
| <b>Marital Status (vs. Never Married)</b>   |                        |              |                        |          |
| Married                                     | 1.16 (0.88-1.51)       | p=0.284      | 1.07 (0.78-1.45)       | p=0.684  |
| Divorced / Widowed                          | 1.72 (0.60-4.39)       | p=0.272      | 1.02 (0.33-2.84)       | p=0.973  |
| <b>Disability (vs. No**)</b>                |                        |              |                        |          |
| Yes                                         | 1.17 (0.85-1.58)       | p=0.324      | 0.95 (0.66-1.34)       | p=0.760  |
| <b>URM (vs. No)</b>                         |                        |              |                        |          |
| Yes                                         | 1.57 (1.20-2.04)       | p=0.001<br>* | 1.40 (1.03-1.88)       | p=0.029* |
| <b>Debt Burden (vs. &lt;20K)</b>            |                        |              |                        |          |
| 20-100K                                     | 4.94 (3.46-7.24)       | p<0.001<br>* | 4.85 (3.32-7.30)       | p<0.001* |
| >100K                                       | 10.51 (7.47-<br>15.22) | p<0.001<br>* | 13.22 (9.05-<br>19.90) | p<0.001* |
| <b>Specialty Competitiveness (vs. High)</b> |                        |              |                        |          |

|                                              |                  |              |                  |          |
|----------------------------------------------|------------------|--------------|------------------|----------|
| Low                                          | 1.21 (0.92-1.61) | p=0.188      | 1.11 (0.69-1.78) | p=0.669  |
| Moderate                                     | 1.45 (1.09-1.95) | p=0.012<br>* | 1.31 (0.93-1.87) | p=0.131  |
| <b>Specialty Category (vs. Surgical)</b>     |                  |              |                  |          |
| Medical                                      | 0.98 (0.75-1.28) | p=0.855      | 1.02 (0.64-1.61) | p=0.940  |
| Mixed                                        | 1.08 (0.82-1.45) | p=0.575      | 1.09 (0.77-1.55) | p=0.621  |
| <b>Degree Type (vs. MD)</b>                  |                  |              |                  |          |
| DO                                           | 2.09 (1.40-3.09) | p<0.001<br>* | 1.59 (0.91-2.76) | p=0.098  |
| <b>School Category (vs. Public)</b>          |                  |              |                  |          |
| Private                                      | 1.15 (0.96-1.38) | p=0.125      | 1.45 (1.06-1.98) | p=0.019* |
| <b>Region (vs. Non-Coastal)</b>              |                  |              |                  |          |
| Northeast                                    | 0.90 (0.72-1.11) | p=0.312      | 0.96 (0.72-1.29) | p=0.798  |
| West Coast                                   | 1.13 (0.90-1.42) | p=0.284      | 1.57 (1.17-2.13) | p=0.003* |
| <b>City Character (vs. Non-Metropolitan)</b> |                  |              |                  |          |

|                                                                                    |                  |              |                  |          |
|------------------------------------------------------------------------------------|------------------|--------------|------------------|----------|
| Metropolitan                                                                       | 0.93 (0.77-1.11) | p=0.409      | 0.92 (0.71-1.18) | p=0.508  |
| <b>School Average Tuition (vs. &lt;40K)</b>                                        |                  |              |                  |          |
| 40-60K                                                                             | 1.26 (0.95-1.69) | p=0.122      | 0.95 (0.68-1.35) | p=0.774  |
| >60K                                                                               | 1.31 (0.95-1.83) | p=0.102      | 0.91 (0.60-1.37) | p=0.648  |
| <b>Leave of Absence for Wellbeing (vs. Never Considered)</b>                       |                  |              |                  |          |
| I have considered taking a leave of absence from school for my personal well-being | 1.58 (1.26-1.98) | p<0.001<br>* | 1.48 (1.13-1.93) | p=0.004* |
| I have taken a leave of absence from school for my personal well-being             | 1.54 (0.99-2.35) | p=0.050      | 1.34 (0.78-2.25) | p=0.276  |

266 \*Statistically significant at p<.05

267 \*\*Includes: 'no' and 'I'd prefer not to say'

268

## 269 **Severe Distress by Debt Amount**

270 Levels of generalized severe distress differed across debt burden groups. As debt level increased,  
 271 the percentage of individuals with "severe" distress increased (p <0.001).

## 272 **Debt and Career Decisions**

273 There were significant differences between the high debt stress versus low debt stress groups and  
274 plans to pursue highly vs. moderately vs. minimally competitive specialties ( $p=.027$ ) (**Fig 1**). A  
275 greater percentage of low debt stress students were pursuing a highly competitive specialty or a  
276 minimally competitive specialty. A greater percentage of high debt stress students were pursuing  
277 a moderately competitive specialty. As shown in **Table 3**, there were no differences in debt-  
278 associated stress between students who choose different specialties, such as medical versus  
279 surgical versus mixed (medical/surgical).

### 280 **Fig 1. Debt Stress by Specialty Competitiveness**

281

## 282 **URM Students' Experience of Debt**

283 URM identity was an independent risk factor for higher debt-related stress (**Table 3**). In addition,  
284 debt levels varied between those who identify as URM versus non-URM ( $p < 0.001$ ). Students  
285 identifying as URM tended to have higher debt than those who did not. Although the percentage  
286 of non-URM students was higher than that of URM students within the lowest debt burden  
287 category ( $< \$20k$ ), among all higher debt burden categories, including  $\$20-100K$ ,  $\$100-300K$ ,  
288 and  $> \$300K$ , the percentage of URM students was higher than the percentage of non-URM  
289 students.

## 290 **Moderating Factors on the Relationship Between Debt and Debt Stress**



291 Protective factors such as high degree of mental health resource utilization and meeting with a  
292 counselor did not reduce the impact of debt burden on debt stress. Among students who reported  
293 a high degree of mental health resource utilization, there was no impact on the relationship  
294 between debt and debt stress ( $p= 0.968$ ). Similarly, meeting with a counselor had no impact on  
295 the relationship between debt and debt stress ( $p= 0.640$ ).

## 296 **Interview Respondents and Qualitative Analysis**

297 We conducted in-depth, semi-structured interviews with 11 medical students, who are  
298 briefly described in **Table 2**. Among the medical student interviewees, there was representation  
299 from all regions, including the Northeast ( $n=3$ ), West Coast ( $n=5$ ), Midwest ( $n=2$ ), and South  
300 ( $n=1$ ). Students were also from all clinical phases, including pre-clinical ( $n=3$ ), clinical ( $n=4$ ),  
301 gap year/other ( $n=2$ ), and post-clinical ( $n=2$ ). Most interviewees were female ( $n=8$ ) and 5 of the  
302 interviewees identified as URM. Financial support systems were diverse, including self ( $n=3$ ),  
303 spouse/partner ( $n=3$ ), and parents/other ( $n=5$ ). Most interviewees reported low debt stress ( $n=8$ ),  
304 as opposed to high debt stress ( $n=3$ ). Fifty-five percent of interviewees planned to pursue  
305 specialties that pay  $< \$300K$  ( $n=6$ ), with some pursuing specialties that pay  $\$300-400K$  ( $n=2$ ) and  
306  $> \$400K$  ( $n=3$ ).

307 Among the MSWS free-text responses, to the prompt, "What well-being resource(s), if offered at  
308 your school, do you feel would be most useful?" 20 of 118 respondents (16.9%) provided free-  
309 text responses that pertained to debt, cost of medical school, or finances. To the prompt "If you  
310 have any further comments to share, please write them below" 11 of 342 students (3.2%)  
311 provided relevant free-text responses. Analysis of the free-text responses and semi-structured

312 interviews revealed 6 distinct insights (**Table 4**), with each insight translated into an actionable  
 313 design opportunity.

314 **Table 4. Representative Quotes for Each Insight**

| <b>Insight and Representative Quotes</b>                                         |                                                                                                                                                                                                                                                                                                        |
|----------------------------------------------------------------------------------|--------------------------------------------------------------------------------------------------------------------------------------------------------------------------------------------------------------------------------------------------------------------------------------------------------|
| <b>Insight 1:. Medical school is a risky investment for low-income students.</b> |                                                                                                                                                                                                                                                                                                        |
| <b>Theme 1a: Questionable Job Security</b>                                       | 1a.1 "Having an MD salary means financial security, wherever you are. And I know I'm going to be okay."                                                                                                                                                                                                |
|                                                                                  | 1a.2 "I wanted to do radiation oncology and still kind of want to but the whole rumors signaling the job market really scared me."                                                                                                                                                                     |
|                                                                                  | 1a.3 "That future is not totally certain. So it may be that I don't get the high paying job that I would need to pay it off. Or it could be that there are healthcare reforms and doctors salaries go down."                                                                                           |
|                                                                                  | 1a.4 "I worry that there will be more equity issues from students not being able to take on debt because they're less confident that their compensation down the line will allow them to pay off that debt."                                                                                           |
|                                                                                  | 1a.5 "I'm just really fortunate that the things in life that I'm passionate about [medicine], do pay well, fingers crossed, and I will have some sense of financial security and financial prosperity."                                                                                                |
| <b>Theme 1b: Disappointing MD Salary and Satisfaction Payoff</b>                 | 1b.1 "I get so pissed when some of my friends or acquaintances from other programs that tell me like, 'oh, you're gonna be a doctor, you'll pay it off.' Like, you're in an MBA program and once you graduate, you're going to be making 50 to 100k way before I even get to see a six figure salary." |
|                                                                                  | 1b.2 "There are other health care professionals (ie: NPs and PAs) that will not accrue the same amount of loans that we will, and then may or may not have the same salary or privileges depending on where they work...makes me question, Did I do the right thing [ going to medical school]?"       |
|                                                                                  | 1b.3 "Doctors' salaries are not this luxury thing that people think anymore.. You want quick, easy money? If you want the big money, you go into [computer science] CS, you go into consulting."                                                                                                       |

|                                                                                                                                       |                                                                                                                                                                                                                                                                                                                                                                                                                                                                                                                                                                                                                                                                                                                                                                                                                                 |
|---------------------------------------------------------------------------------------------------------------------------------------|---------------------------------------------------------------------------------------------------------------------------------------------------------------------------------------------------------------------------------------------------------------------------------------------------------------------------------------------------------------------------------------------------------------------------------------------------------------------------------------------------------------------------------------------------------------------------------------------------------------------------------------------------------------------------------------------------------------------------------------------------------------------------------------------------------------------------------|
|                                                                                                                                       | <p>1b.4 "It's ridiculous that we put in 4 years to get into serious debt, then another 4 years of on average getting less than minimum wage, and then go on to be an attending where you work long hours and face risk of malpractice at all times. If I had to do it all over again medicine would not be my choice."</p>                                                                                                                                                                                                                                                                                                                                                                                                                                                                                                      |
|                                                                                                                                       | <p>1b.5 "I won't start having or like making significant amounts of money to live a comfortable life until I'm much older. And that's like really like frustrating to think that I won't be until I'm like 40 or even 50 will I be able to live comfortably. And it's like at that point, how much of my life is gone."</p>                                                                                                                                                                                                                                                                                                                                                                                                                                                                                                     |
|                                                                                                                                       | <p>1b.6 "I do think obviously you are helping people, you are making a difference, but I don't think [being a doctor is] as profound or as meaningful as I thought"</p>                                                                                                                                                                                                                                                                                                                                                                                                                                                                                                                                                                                                                                                         |
| <p><b>Design Opportunity 1: Support low-income students to make values-based tradeoffs when considering a career in medicine.</b></p> |                                                                                                                                                                                                                                                                                                                                                                                                                                                                                                                                                                                                                                                                                                                                                                                                                                 |
| <p style="background-color: #cccccc;"></p>                                                                                            |                                                                                                                                                                                                                                                                                                                                                                                                                                                                                                                                                                                                                                                                                                                                                                                                                                 |
| <p><b>Insight 2: Medical schools lack the adaptive infrastructure to be welcoming to low-income students.</b></p>                     |                                                                                                                                                                                                                                                                                                                                                                                                                                                                                                                                                                                                                                                                                                                                                                                                                                 |
| <p><b>Theme 2a: Financial Barriers to Applying to Medical School</b></p>                                                              | <p>2a.1 "When I was applying for med schools, finances were, for example, restricting me in terms of number of schools I applied and in terms of the location."</p> <p>2a.2 "I would have loved to take one of those Kaplan courses for taking the MCAT but for me, I just could not afford it and I just was like, 'No, I'm just going to study myself and see what happens.'"</p> <p>2a.3 "MCAT tutoring is costly and the kids that are going to get the perfect scores they are maybe the ones who have extra prep, where they can pay for those types of things."</p> <p>2a.4 "When some people have so many other competing financial challenges, like family and other responsibilities... there are definitely people who have not gone to medical school that would have wanted to if costs were not prohibitive."</p> |

|                                                                                                                                                                           |                                                                                                                                                                                                                                                                                                                                                                                              |
|---------------------------------------------------------------------------------------------------------------------------------------------------------------------------|----------------------------------------------------------------------------------------------------------------------------------------------------------------------------------------------------------------------------------------------------------------------------------------------------------------------------------------------------------------------------------------------|
| <b>Theme 2b: Financial Obligations for Low-Income Families</b>                                                                                                            | 2b.1 "I end up having the most fluid income of anyone in my family, because my parents live paycheck to paycheck and if the paycheck hadn't come, they couldn't afford the health bill or the car repair or whatever."                                                                                                                                                                       |
|                                                                                                                                                                           | 2b.2 "My scholarships certainly did get spread out over my family whenever something was needed."                                                                                                                                                                                                                                                                                            |
|                                                                                                                                                                           | 2b.3 "And one thing that I was worried about going to [private school] is that the person who I list on my FAFSA...is my father, and my father is manipulative, he lies."                                                                                                                                                                                                                    |
|                                                                                                                                                                           | 2b.4 "[When a student has to include a family member on the FAFSA form] I can only imagine what happens if you have a parent who has a significant substance use disorder and doesn't have a job or is like MIA or is just really unreliable."                                                                                                                                               |
| <b>Theme 2c: Incomplete Financial Support</b>                                                                                                                             | 2c.1 "I think it would have been easier if I didn't have to work on top of school, I do have to admit, and sometimes I got a little jealous of others who didn't necessarily have to do that and could just like do their school, and whatever else they wanted to."                                                                                                                         |
|                                                                                                                                                                           | 2c.2 "It would be great if [medical schools] could provide more financial aid for like a more gradual transition. If your family makes under \$125k, you're fine, between \$125k and \$165k...you go from full support, to no support. And I think that that's way too steep."                                                                                                               |
| <b>Design Opportunity 2: Develop flexible systems that can recognize and accommodate students' complex financial needs during medical school.</b>                         |                                                                                                                                                                                                                                                                                                                                                                                              |
| <b>Insight 3: Students worry about the impact that their medical school debt has on their present and future families, which compounds feelings of guilt and anxiety.</b> |                                                                                                                                                                                                                                                                                                                                                                                              |
| <b>Theme 3a: Debt as a Family Sacrifice</b>                                                                                                                               | 3a.1 "With every step I take [to get further training for my career], I potentially put [my partner] back, which then puts our total household income back."                                                                                                                                                                                                                                 |
|                                                                                                                                                                           | 3a.2 "The family's going to school."                                                                                                                                                                                                                                                                                                                                                         |
|                                                                                                                                                                           | 3a.3 "So I turned down the spot as a MD/PhD when I was a senior year of undergrad because at that point, I was pretty convinced that MD/PhD wouldn't let me go the way I want to go. And so yeah, so my parents were mad at me... I turned [the MD/PhD program] down in the same phone call. And [my parents were] like...'That's like a \$250,000 decision. You didn't even ask us first.'" |

|                                                                                                                                                               |                                                                                                                                                                                                                                                                                                                                                                                                                                                                                                                                                                                                                           |
|---------------------------------------------------------------------------------------------------------------------------------------------------------------|---------------------------------------------------------------------------------------------------------------------------------------------------------------------------------------------------------------------------------------------------------------------------------------------------------------------------------------------------------------------------------------------------------------------------------------------------------------------------------------------------------------------------------------------------------------------------------------------------------------------------|
|                                                                                                                                                               | <p>3a.4 "I am going to marry someone who works in education. He'll probably only make 100,000 a year, if that, depending on the state we live in and depending on the county he serves. He told me this weekend, his ideal plan is that we're engaged by next summer, and he would be happy with a two-year engagement. And we would be getting married once I graduate med school. And then we basically have a year to get pregnant because he doesn't want to be a certain age, when he has his first kid...And so I stress a lot about the fact that I'm only going to be making \$70,000 on a residency salary."</p> |
|                                                                                                                                                               | <p>3a.5 "I think I was really stressed out when we had that first conversation [with my parents] about me taking out a loan in order to pay off my medical school education... I also know... in terms of financial support, it makes more sense for [my parents] to help my sister out as much as possible. And then for me to chip in after I take care of my loans, if she still needs that support."</p>                                                                                                                                                                                                              |
| <b>Theme 3b: Pressure to Provide Financially</b>                                                                                                              | <p>3b.1 "Being of low SES, the most significant stressor for me is the financing of medical school and the pull of responsibilities to my family."</p>                                                                                                                                                                                                                                                                                                                                                                                                                                                                    |
|                                                                                                                                                               | <p>3b.2 "I'm gonna roll in [to marriage] with however many thousands of dollars of debt I'll have by the end of fourth year, and be like, 'Hey, you're marrying me. I don't know what it's going to be like for us.'"</p>                                                                                                                                                                                                                                                                                                                                                                                                 |
|                                                                                                                                                               | <p>3b.3 "I am so education-focused, and there isn't really anything else besides that, but then I see my friends get engaged and get married, and then think about having kids at the right times, and I'm like, Oh my God. That's a lot to be dealing with during medical school. All I have to do is worry about is this."</p>                                                                                                                                                                                                                                                                                          |
|                                                                                                                                                               | <p>3b.4 "The pressure to provide [for my future family] is definitely there."</p>                                                                                                                                                                                                                                                                                                                                                                                                                                                                                                                                         |
| <b>Design Opportunity 3: Create an environment that acknowledges and accounts for the burden of responsibility that students face towards their families.</b> |                                                                                                                                                                                                                                                                                                                                                                                                                                                                                                                                                                                                                           |
| <b>Insight 4: Without the appropriate education about loans, the stress of debt is exponentially worse.</b>                                                   |                                                                                                                                                                                                                                                                                                                                                                                                                                                                                                                                                                                                                           |
| <b>Theme 4a: Missing Roadmap for Becoming Debt-Free</b>                                                                                                       | <p>4a.1 "Nobody in my family is in medicine, so nobody really knows the process. So, everything that I know is from the internet or from a friend and that does scare me."</p>                                                                                                                                                                                                                                                                                                                                                                                                                                            |
|                                                                                                                                                               | <p>4a.2 "I don't know what my options are."</p>                                                                                                                                                                                                                                                                                                                                                                                                                                                                                                                                                                           |

|                                                               |                                                                                                                                                                                                                                                                                                                                                                                                                 |
|---------------------------------------------------------------|-----------------------------------------------------------------------------------------------------------------------------------------------------------------------------------------------------------------------------------------------------------------------------------------------------------------------------------------------------------------------------------------------------------------|
|                                                               | <p>4a.3 "One of my fears is that I don't know what I don't know. I really have no idea how I'm going to pay for [medical school and medical training], what that's going to look like"</p>                                                                                                                                                                                                                      |
|                                                               | <p>4a.4 "The biggest worry is, what if [the debt] becomes so large that I am never able to pay it off and it ends up ruining me financially. I guess for me, that means that I never have enough money in my bank account to buy food or make normal bill payments, or if I have kids, I can't do fun things."</p>                                                                                              |
|                                                               | <p>4a.5 "It [the total cost of medical school] is just like such a giant number that it's hard to wrap your head around."</p>                                                                                                                                                                                                                                                                                   |
| <p><b>Theme 4b: Resources About Loans and Debt Payoff</b></p> | <p>4b.1 "Once [students] just have some of that general information, it really helps mental wellbeing, because instead of it being some sort of mystery, 'Oh, my gosh, I took out all this debt, I don't know what I'm going to be doing with it once I'm done,' they do have somewhat of a plan and somewhat of an idea of what's going to be coming afterwards."</p>                                          |
|                                                               | <p>4b.2 "When [the financial aid counselor] broke down the math, the way the interest works, he's like, 'it saves you nothing to pay it off this timeline versus this one.' And so I have a better sense of like, 'Oh, I can have the life I want of the house and the family and the career and get my loans paid off and have retirement and savings.' And so there is peace of mind that I have a plan."</p> |
|                                                               | <p>4b.3 "They [the financial aid counselors] had a little presentation just about how we were expected to pay the debt off and kind of their plan; it was nice to see that there was a way to do it."</p>                                                                                                                                                                                                       |
|                                                               | <p>4b.4 "I do kind of feel bad for people who don't have somebody to do research and worry about it [loans] because that's just another thing on you."</p>                                                                                                                                                                                                                                                      |
|                                                               | <p>4b.5 "[Having a father as a physician] I had a good idea of what that [medical school cost] was going to be. And the understanding that that cost is on the horizon. Also, understanding that, you know, with compensation down the line, that can be a worthwhile investment to do."</p>                                                                                                                    |
|                                                               | <p>4b.6 "I've had explicit discussions with physicians who went to med school, had debt, paid it off or are still paying it off, and hearing from them and still seeing that they're able to take trips whenever they want to or seeing that the debt hasn't hindered their life in any way, I think that just kind of makes me feel a lot calmer than I think the average person would."</p>                   |

**Design Opportunity 4: Empower students to become experts in managing their debt by making loan-related resources more available and accessible.**

**Insight 5: The small, daily expenses are the most burdensome and cause the greatest amount of stress.**

**Theme 5a: Different Types of Costs**

5a.1 "My parents contributing to my food and living would make me think a little bit less about how I'm spending my money every single day, as opposed to just focusing, work and studying to school. And I feel better that my loans are just for tuition, as opposed to knowing that every dollar that I do spend, if I taken out a loan for living as well, is not actually my money, and it's something that's contributing to something that I'll have to pay off in the future. I would definitely skimp out on purchasing certain things."

5a.2 "I remember talking with my mom, and she didn't understand why I had [private school] on the list, but I didn't have [private school] and [private school]. And I was like, 'well, Boston is like five times as expensive as Baltimore. I think I'll be too stressed to actually do well in medical school."

5a.3 "It's easier for me to think about [loans as] some amount that the school gets, that I never see. And then the other amount is something that I actually do see, and I actually get to use and put towards living."

**Theme 5b: Lifestyle Adjustments**

5b.1 "I only have to buy groceries for myself, like twice a month because I might not have the healthiest relationship with food. So I eat the exact same thing like all the time I eat my rice and beef bowl, or my rice and chicken bowl lunch and dinner every day. It's been great. So that has allowed me to actually finish off the school year with an extra \$7000 that I wasn't anticipating."

5b.2 "I usually cut costs when it came to food, like I did not eat out. I still do not eat out very often. I cook most of my own meals. I don't necessarily go out, like my entertainment budget is very small."

5b.3 "I always over-estimate [my budget] and then hope to spend less."

5b.4 "I'm really big on walking places or using public transit to get places whenever I can. I'm always thinking about turning off the lights in my house and making sure that things are not just running because the gas bill can be pretty high."

**Design Opportunity 5: Develop and distribute resources to support both short- and long-term financial costs for medical students.**

| <b>Insight 6: Students view debt as a dark cloud that constrains their mental health and dictates their career trajectory.</b> |                                                                                                                                                                                                                                                                                 |
|--------------------------------------------------------------------------------------------------------------------------------|---------------------------------------------------------------------------------------------------------------------------------------------------------------------------------------------------------------------------------------------------------------------------------|
| <b>Theme 6a: Mental Health Impact</b>                                                                                          | 6a.1 "I don't know how [debt is] gonna affect my marriage, but I imagine it will, in some way, because my partner doesn't have any debt."                                                                                                                                       |
|                                                                                                                                | 6a.2 "I feel like it's just emotional fear...that the debt will shape at least for some number of years, my expenses, and my budget."                                                                                                                                           |
|                                                                                                                                | 6a.3 "As long as you're in debt, you're owned by someone or something and the sooner you can get out of it, the better; the sooner I can get started with my life."                                                                                                             |
| <b>Theme 6b: Academic Performance Impact</b>                                                                                   | 6b.1 "I feel like I'm spending so much time and emotional mental energy on addressing my financial needs, while some of my peers can just focus purely on their career development."                                                                                            |
|                                                                                                                                | 6b.2 "I definitely would feel constant financial issues that I had running in the back of my mind. That definitely affected my ability to concentrate and focus on things, and I felt like it ran my battery down."                                                             |
|                                                                                                                                | 6b.3 "It's like a weight off my shoulders [to not have educational debt]. I feel like you can just focus."                                                                                                                                                                      |
| <b>Theme 6c: Specialty Choice Impact</b>                                                                                       | 6c.1 "Because of [financial aid that] I have gotten at [private school], I'm able to be a lot more flexible in what I choose as a specialty."                                                                                                                                   |
|                                                                                                                                | 6c.2 "I think it [scholarships] give me the freedom to do [specialties] that maybe are a little bit less well-paying in medicine."                                                                                                                                              |
|                                                                                                                                | 6c.3 "I would say that the finances are really deterring me from medical specialties that just don't pay well."                                                                                                                                                                 |
|                                                                                                                                | 6c.4 "I was worried how much debt I had racked up in undergrad and then grad school...I thought to myself, if I don't get into medical school and get a high paying career, I have no clue how I'm going to pay off like ~\$100,000 in loans."                                  |
|                                                                                                                                | 6c.5 "The specialties that I'm most interested in are not high paying specialties. That part is nice, just knowing that I'm not in a position where I really have to weigh income and potentially make a trade off between how much I get paid versus doing what I want to do." |
|                                                                                                                                | 6c.6 "I loved pediatrics, I love working with the kids... but being an outpatient pediatrician just wasn't going to be enough to justify the [private school] price tag."                                                                                                       |



**Design Opportunity 6: Create a culture of confidence for managing debt and debt-stress among medical students.**

315

316 *Insight 1:* Medical school is a risky investment for low-income students.

317 *Description:* The personal and financial sacrifices required for low-income students to attend  
318 medical school and pursue a career in medicine outweigh the benefits of becoming a physician.  
319 When considering a career in medicine, students feel discouraged by questionable job security  
320 (theme 1a) and reduced financial compensation (theme 1b) – a combination that jeopardizes  
321 immediate and long-term job satisfaction. Some students feel hopeful that their decision to  
322 pursue medicine will be personally rewarding (1b.6) and their salaries will stabilize (1a.1, 1a.5),  
323 but many low-income students experience doubt about whether they made the right career choice  
324 (1b.2, 1b.4, 1b.6) , and feel stressed that they will be in debt for longer than they expected (1a.3,  
325 1a.4, 1b.1, 1b.5). **Support low-income students to make values-based tradeoffs when considering a  
326 career in medicine.**

327 *Design Opportunity:* Support low-income students to make values-based tradeoffs when  
328 considering a career in medicine.

329

330 *Insight 2:* Medical schools lack the adaptive infrastructure to be welcoming to low-income  
331 students.

332 *Description:* Students face financial challenges from the moment they apply to medical school  
333 (theme 2a), a costly process that limits admissions options for low-income students due to their  
334 inability to pay for numerous application fees (2a.1) and expensive test preparation courses (2a.2,

335 2a.3). Once students begin medical school, they feel unsupported in their varied responsibilities  
336 towards their families (theme 2b) and additional financial needs (theme 2c), requiring them to  
337 make tradeoffs with their education and personal lives (2b.2, 2c.1).

338 Design Opportunity 2: Develop flexible systems that can recognize and accommodate students'  
339 complex financial needs during medical school.

340

341 Insight 3: Students worry about the impact that their medical school debt has on their present and  
342 future families, which compounds feelings of guilt and anxiety.

343 Description: For students who need to take loans, the decision to pursue a career in medicine is a  
344 collective investment with their families. Students feel guilty about the sacrifices their families  
345 have to make for the sake of their career (theme 3a) and feel pressure to continue to provide  
346 financially for their family while having debt (theme 3b). Students are stressed about acquiring  
347 more debt throughout their training (3a.1) and the impact that has on loved ones who are  
348 dependent on them (3a.4, 3a.5, 3b.2), especially with respect to ensuring their financial security  
349 in the future (3b.4).

350 Design Opportunity 3: Create an environment that acknowledges and accounts for the burden of  
351 responsibility that students face towards their families.

352

353 Insight 4: Without the appropriate education about loans, the stress of debt is exponentially  
354 worse.

355 *Description:* Students feel the greatest fear around loans when they do not understand them,  
356 including the process of securing loans and paying off debt (theme 4a). Students are  
357 overwhelmed by their loan amounts (4a.5) and lack the knowledge or resources to manage their  
358 debt (4a.1, 4a.2), making them uncertain about how they will become debt-free in the future  
359 (4a.3, 4a.4). Students reported that various resources helped to alleviate those burgeoning fears  
360 (theme 4b), including financial aid counselors (4b.2, 4b.3) and physician role models (4b.5, 4b.6)  
361 that generally increase knowledge and skills related to debt management (4b.1).

362 *Design Opportunity 4:* Empower students to become experts in managing their debt by making  
363 loan-related resources more available and accessible.

364 *Insight 5:* The small, daily expenses are the most burdensome and cause the greatest amount of  
365 stress.

366 *Description:* Students with educational debt are mentally unprepared for the burden of managing  
367 their daily living expenses (theme 5a), causing them to make significant lifestyle adjustments in  
368 the hopes to ease their resulting anxiety (theme 5b). These costs are immediate and tangible,  
369 compared to tuition costs which are more distant and require less frequent management (5a.3)  
370 Students learn to temper their expectations for living beyond a bare minimum during medical  
371 school (5a.1, 5b.2, 5b.4) and develop strategies to ensure that their necessary expenses are as low  
372 as possible (5b.1, 5b.2, 5b.3, 5b.4).

373 *Design Opportunity 5:* Develop and distribute resources to support both short- and long-term  
374 financial costs for medical students.

375 *Insight 6:* Students view debt as a dark cloud that constrains their mental health and dictates their  
376 career trajectory.

377 *Description:* The constant burden of educational debt constrains students' abilities to control  
378 their mental health (theme 6a) and pursue their desired career path in medicine (themes 6b & 6c).  
379 Students feel controlled by their debt (6a.3) and concerned that it will impact their [ability] to  
380 live a personally fulfilling life (6a.1, 6a.2, 6c.6), especially with respect to pursuing their desired  
381 medical specialties (6b.1, 6c.3, 6c.5, 6c.6). Students with scholarships, as opposed to loans, felt  
382 more able to choose specialties that prioritized their values rather than their finances (6c.1, 6c.2),  
383 an affordance that impacts long-term career growth and satisfaction.

384 *Design Opportunity 6:* Create a culture of confidence for managing debt and debt-stress among  
385 medical students.

## 386 **Discussion**

387 This is the first multi-institutional national study to explore the impact of debt-related  
388 stress on medical students' well-being in the United States. We used an innovative, mixed  
389 methods approach to better understand the factors that significantly affect debt-related stress, and  
390 propose opportunities for improving medical student well-being.

## 391 **URM Students**

392 Analysis of survey results found that students who identify as URM are more likely to  
393 experience higher levels of debt-related stress than non-URM students. Our study also found that  
394 among all higher debt burden categories, debt levels were higher for URM students, findings

395 consistent with studies that have shown the disproportionate burden of debt among URM  
396 students.<sup>1</sup> Our semi-structured interviews illuminated that students from low-income  
397 backgrounds feel unsupported by their medical schools in these varied financial stressors that  
398 extend beyond tuition costs (insight 2), leaving their needs unmet and increasing financial stress  
399 over time: *“We don’t have different socio-economic classes in medicine because there’s  
400 constantly a cost that [isn’t] even factored into tuition cost [and] that we can’t take student loans  
401 for.”* Many URM students feel especially stressed by their financial obligations towards their  
402 families (insight 3), and describe the decision to enter into medicine as one that is collective  
403 (*“the family’s going to school”*) rather than individual, placing additional pressure on themselves  
404 to succeed in their career: *“Being of low SES, the most significant stressor for me is the financing  
405 of medical school and the pull of responsibility for my family.”* Several other studies from the  
406 literature confirm that students who identify as URM and first generation college or medical  
407 students are at higher risk for financial stress compared to their counterparts,<sup>7</sup> and report that  
408 they feel as though it is their responsibility to honor their families through their educational and  
409 career pursuits.<sup>23</sup> Our study demonstrates and describes how low-income and URM students  
410 face numerous financial barriers in medical school, resulting in medical trainees that are less  
411 diverse than the patient populations they are serving.<sup>1,8</sup>

## 412 **Debt Amount**

413 Our quantitative analysis found that students with debt amounts over \$100,000 are at  
414 much higher risk for experiencing severe stress than students with debt less than that amount.  
415 Although this finding may seem intuitive, it is important to highlight the degree to which this

416 risk differs between these two cohorts. Students with debt amounts between \$20,000 and  
417 \$100,000 are approximately 5 times more likely to experience high stress than students with debt  
418 less than \$20,000, while students with debt amounts over \$100,000 are approximately 13 times  
419 more likely to experience severe stress when compared to the same cohort. Interview participants  
420 describe that the more debt they have, the less hopeful they feel towards achieving financial  
421 security (insight 1): *“There are other healthcare professionals that will not accrue the same*  
422 *amount of loans that we will, and then may or may not have the same salary or privileges [...]*  
423 *makes me question, did I do the right thing?”* Students internalize this rising stress so as not to  
424 shift the feelings of guilt onto their families (insight 3), thereby compounding the psychological  
425 burden associated with large amounts of debt (insight 6): *“As long as you’re in debt, you’re*  
426 *owned by someone or something and the sooner you can get out of it, the better; the sooner I can*  
427 *get started with my life.”*

## 428 **Pre-Clinical Students**

429 According to our survey analysis, students who are in their pre-clinical years are at higher  
430 risk for stress than students in their clinical years. Our interview findings from insight 4 suggest  
431 that students feel initially overwhelmed and unsure about what questions to ask (*“One of my*  
432 *fears is that I don’t know what I don’t know”*) or how to manage their loans so that it doesn’t  
433 have a permanent impact on their lives: *“The biggest worry is, what if [the debt] becomes so*  
434 *large that I am never able to pay it off and it ends up ruining me financially.”* Pre-clinical  
435 students may therefore feel unsure or ill-equipped to manage their loans, making them feel  
436 overwhelmed by the initial stimulus of debt. By the time students reach their clinical years, they

437 may have had time to develop strategies for managing stress, acquire more financial knowledge,  
438 and/or normalize the idea of having debt.

## 439 **Medical School Characteristics**

440 Our survey analysis found several risk factors related to medical school characteristics.  
441 First, we found that students who attended a private school were at higher risk for debt-related  
442 stress than students who attended a public school. Not only is the median 4-year cost of  
443 attendance in 2023 was almost \$100,000 higher in private compared to public medical schools,<sup>24</sup>  
444 but it is also the case that financial aid packages are more liberally available for public schools  
445 due to state government funding.<sup>25</sup> This not only relieves students from having higher amounts of  
446 debt, but it also creates a more inclusive cohort of medical students. Insight 2 from our  
447 interviews reveal that private medical schools without the infrastructure that can adapt to  
448 students' varying needs (e.g. financial aid vs loans).

449 Another characteristic that was found to be a risk factor for debt stress was attending a  
450 medical school on the West Coast (compared to a non-coastal school.) This was a surprising  
451 finding given that tuition rates for both private and public schools on the West Coast are no  
452 higher than those in other regions.<sup>17</sup> The distribution of survey respondents did not vary  
453 significantly across regional categories, so no bias in sample size is suspected. A potential  
454 explanation might be that historically, students match for residency programs that are in their  
455 home state or not far from their home state.<sup>26, 27</sup> Students may prefer to settle on the West Coast,  
456 and may be willing to take on more financial debt in pursuit of their long-term practice and  
457 lifestyle goals.

## 458 **Gap Year**

459           Our quantitative analysis found that students who reported having considered taking a  
460 leave of absence for well-being purposes were at higher risk for debt-related stress. This cohort  
461 of students likely experience higher levels of stress as they are conscious of the negative impact  
462 it has on their life, and have already ruminated on leaving medical school. A study by Fallar et  
463 al. found that the period leading up to a leave of absence is particularly stressful for students  
464 because they are unfamiliar with the logistics of taking time off, and don't feel as though leaving  
465 medical school is encouraged or normalized for students.<sup>28</sup> An interview with a student who did a  
466 joint MD and PhD program expressed having more time for herself during her PhD program, and  
467 described using money for activities that could alleviate stress (*"I took figure skating during my*  
468 *PhD"*) rather than create more stress by compromising on their lifestyle during medical school  
469 (insight 5). More research may be needed to better understand and support students considering  
470 taking a leave of absence from medical school.

## 471 **Specialty Choice**

472           Our study found that students with high debt stress pursue moderately competitive  
473 specialties compared to students with low debt stress. This may be explained by the fact that low  
474 debt stress gives students the freedom to pursue minimally competitive specialties, which may be  
475 more fulfilling to them but typically have lower salaries. Insight 6 further elaborates upon this  
476 finding that students with high debt stress deprioritize specialties for which they are passionate in  
477 favor of higher paying specialties that might alleviate their debt: *"I love working with kids...but*  
478 *being an outpatient pediatrician just wasn't going to be enough to justify the [private school] price*



479 tag.” Students with lower debt stress describe having the freedom to choose specialties that align  
480 with their values, regardless of anticipated salary: “*Scholarships give me the freedom to do*  
481 *[specialties] that maybe are a little bit less well-paying in medicine.*” Interestingly, certain  
482 studies examining the relationship between specialty choice and debt stress have found that high  
483 debt stress is associated with a higher likelihood of pursuing a more competitive, and presumably  
484 higher paying, specialty.<sup>5</sup> More research investigating the relationship between debt stress and  
485 specialty choice could illuminate opportunities for increasing a sense of agency and overall  
486 satisfaction among students for their career choices.

## 487 **Resource Utilization**

488 In our exploration of potential protective factors against the effects of debt-related stress,  
489 our survey analysis found that the two variables measured (high mental health resource  
490 utilization and meeting with a counselor) did not have any impact on reducing debt-related  
491 stress. This finding is inconsistent with the literature, which considers these activities to promote  
492 general well-being among students but has never been studied in the context of debt-related  
493 stress.<sup>13-15</sup> A potential explanation is that the survey questions that assessed these activities were  
494 imperfect. For example, the question of meeting with a counselor was not a standalone question,  
495 but instead, was at the bottom of a list of other wellbeing activities; therefore, students may have  
496 been fatigued by the time they got to the bottom of the list and not selected it. Additionally, our  
497 definition of “high” mental health resource utilization may have been perceived as too strict (i.e.:  
498 80-100%) and perhaps we would have seen effects at lower percentages of utilization (i.e.: 40-  
499 60%). Despite this finding, students describe in their interviews that having access to certain

500 resources such as financial knowledge and physician role models can help to alleviate stress by  
501 helping them feel confident in managing their loans in the immediate and more distant future  
502 (insight 4): *“I’ve had explicit discussions with physicians who went to med school, had debt,  
503 paid it off [...] the debt hasn’t hindered their life in any way. I think that just makes me feel a lot  
504 calmer.”* This finding aligns with previous studies that suggest that financial knowledge, such as  
505 knowledge about loans and a payoff plan, confers confidence in students’ financial  
506 management.<sup>11,12</sup> These factors are also aligned with previous studies that suggest financial  
507 optimism, such as with a physician role model who successfully paid off loans, are associated  
508 with less financial stress.<sup>10</sup>

## 509 **Next Steps**

510 Our quantitative analysis of risk factors helped us to identify which areas might  
511 significantly impact debt-related stress among medical students, while our qualitative analysis  
512 provided more in-depth insight into those risk factors for more human-centered intervention  
513 design. The HCD process not only provides additional context from the perspective of medical  
514 students, but also proposes distinct design opportunities upon which interventions may be  
515 designed and tested. The six design opportunities outlined in this paper span distinct areas of  
516 impact across the ecosystem, and support the co-design of solutions with students and key  
517 stakeholders. Next steps for this project are to build from the design opportunities to conduct  
518 structured brainstorming sessions with a diverse cross-section of stakeholders. In HCD  
519 brainstorms, design opportunities are framed as “How Might We?” (HMW) questions, which  
520 serve as brainstorming prompts and encourage a breadth of different ideas within a well-defined

521 topic. For example, the design opportunity in insight 2 might be reframed as: “HMW develop the  
522 adaptive infrastructure necessary to recognize and accommodate students’ complex financial  
523 needs?” While existing solutions may be appropriate – such as providing affordable MCAT  
524 preparation or subsidized application fees – creative brainstorming can produce novel and  
525 innovative solutions that may not otherwise exist. Solution concepts are then selected for  
526 iterative prototyping and evaluation with stakeholders, and are continuously refined and  
527 modified until the prototype reaches desirability and feasibility targets.

## 528 **Limitations**

529 Our study had some notable limitations. One potential limitation is that our data  
530 collection occurred between 2019-2021 for this publication in 2023. Additionally, as described in  
531 the original study,<sup>3</sup> a limitation of the MSWS is the inability to determine a response rate of  
532 students due to the survey distribution by medical student liaisons from each medical school;  
533 under the reasonable assumption that the survey was distributed to every US allopathic medical  
534 student, the response rate was estimated to have been 8.7%.<sup>3</sup> An additional limitation is the  
535 potential for response bias.<sup>3</sup> A limitation of the qualitative interviews is the potential for response  
536 bias among the interviewees. Although we purposely sampled, the students who accepted the  
537 invitation to interview may have been students with extreme views, either very negative views of  
538 debt or very neutral views of debt. Additionally, the interviewees were not representative of all  
539 possible financial situations, given that most students were from private schools, which typically  
540 have higher tuition rates. Also, all students had debt amounts in the middle and high categories,  
541 with none in the low category. Finally, our model of risk factors for debt-related stress suggested

542 the presence of negative confounding factors, which exerted effects on specific variables (i.e.:  
543 pre-clinical year, West Coast) for which univariate analysis found no significant associations but  
544 multivariate analysis did. We did not perform further analysis to identify which variables served  
545 as the negative confounding variables.

546 In conclusion, our mixed methods, cross-sectional study exploring debt-related stress and  
547 its impact on US medical students' wellbeing and professional development revealed a set of risk  
548 factors and design opportunities for intervention. By using a combined quantitative and  
549 qualitative HCD approach, we were able to develop a broad, in-depth understanding of the  
550 challenges and opportunities facing medical students with education debt. With these efforts to  
551 support the well-being and academic success of students at higher risk of debt-related stress,  
552 medical education institutions can develop and nurture a more diverse medical field that can best  
553 support the needs of future patients.

554

555

556

557

## 558 **Acknowledgements**

559 We thank the members of The Better Lab, including Devika Patel and Marianna Salvatori, for  
560 their support. We appreciate Pamela Derish (UCSF) for assistance in manuscript editing and the  
561 UCSF Clinical and Translational Science Institute (CTSI) for assistance in statistical analysis.  
562 This publication was supported by the National Center for Advancing Translational Sciences,  
563 National Institutes of Health, through UCSF-CTSI Grant Number UL1 TR001872. Its contents

564 are solely the responsibility of the authors and do not necessarily represent the official views of  
565 the NIH.

566

567

## 568 **References**

- 569 1. James Youngclaus, Julie Fresne. Physician Education Debt and the Cost to Attend Medical  
570 School: 2020 Update. Association of American Medical Colleges. 2020 Oct
- 571 2. Association of American Medical Colleges [Internet]. 2020 [cited 2023 Sep 7]. Medical  
572 School Graduation Questionnaire: 2020 All Schools Summary Report. Available from:  
573 <https://www.aamc.org/data-reports/students-residents/report/graduation-questionnaire-gq>
- 574 3. Rajapuram N, Langness S, Marshall MR, Sammann A. Medical students in distress: The  
575 impact of gender, race, debt, and disability. PLOS ONE. 2020 Dec 3;15(12):e0243250.
- 576 4. Rohlfing J, Navarro R, Maniya OZ, Hughes BD, Rogalsky DK. Medical student debt and  
577 major life choices other than specialty. Med Educ Online. 2014 Nov  
578 11;19:10.3402/meo.v19.25603.
- 579 5. Pisaniello MS, Asahina AT, Bacchi S, Wagner M, Perry SW, Wong ML, et al. Effect of  
580 medical student debt on mental health, academic performance and specialty choice: a systematic  
581 review. BMJ Open. 2019 Jul 1;9(7):e029980.
- 582 6. AAMC [Internet]. [cited 2023 Oct 18]. Unique Populations. Available from:  
583 <https://www.aamc.org/professional-development/affinity-groups/gfa/unique-populations>

- 584 7. McMichael B, Lee IV A, Fallon B, Matusko N, Sandhu G. Racial and socioeconomic  
585 inequity in the financial stress of medical school. *MedEdPublish* (2016). 2022 Jun 13;12:3.
- 586 8. B. McInturff, E. Frontczak. *Medical School Applicant Survey*. 2004 Feb.
- 587 9. Morrison E, Grbic D. Dimensions of Diversity and Perception of Having Learned From  
588 Individuals From Different Backgrounds: The Particular Importance of Racial Diversity.  
589 *Academic Medicine*. 2015 Jul;90(7):937.
- 590 10. Heckman S, Lim H, Montalto C. Factors related to financial stress among college students.  
591 *Journal of Financial Therapy*. 2014;5(1):19–39.
- 592 11. Heckman SJ, Grable JE. Testing the Role of Parental Debt Attitudes, Student Income,  
593 Dependency Status, and Financial Knowledge Have in Shaping Financial Self-Efficacy among  
594 College Students. *College Student Journal*. 2011 Mar;45(1):51–64.
- 595 12. Gillen M, Loeffler DN. Financial Literacy and Social Work Students: Knowledge is Power.  
596 *Journal of Financial Therapy* [Internet]. 2012 Jan 1 [cited 2023 Sep 13];3(2). Available from:  
597 <https://newprairiepress.org/jft/vol3/iss2/4>
- 598 13. Conley CS, Durlak JA, Dickson DA. An Evaluative Review of Outcome Research on  
599 Universal Mental Health Promotion and Prevention Programs for Higher Education Students.  
600 *Journal of American College Health*. 2013 Jul 1;61(5):286–301.
- 601 14. Luken M, Sammons A. Systematic Review of Mindfulness Practice for Reducing Job  
602 Burnout. *Am J Occup Ther*. 2016;70(2):7002250020p1–10.
- 603 15. Weight CJ, Sellon JL, Lessard-Anderson CR, Shanafelt TD, Olsen KD, Laskowski ER.  
604 Physical Activity, Quality of Life, and Burnout Among Physician Trainees: The Effect of a

605 Team-Based, Incentivized Exercise Program. Mayo Clinic Proceedings. 2013 Dec  
606 1;88(12):1435–42.

607 16. Design Kit [Internet]. [cited 2023 Oct 2]. What is Human-Centered Design? Available from:  
608 <https://www.designkit.org/human-centered-design.html>

609 17. AAMC [Internet]. Tuition and Student Fees Reports, 2006-2013 Tuition and Student Fees  
610 Report. Available from: [https://www.aamc.org/data-reports/reporting-tools/report/tuition-and-](https://www.aamc.org/data-reports/reporting-tools/report/tuition-and-student-fees-reports)  
611 [student-fees-reports](https://www.aamc.org/data-reports/reporting-tools/report/tuition-and-student-fees-reports)

612 18. Dyrbye LN, Schwartz A, Downing SM, Szydlo DW, Sloan JA, Shanafelt TD. Efficacy of a  
613 brief screening tool to identify medical students in distress. Acad Med. 2011 Jul;86(7):907–14.

614 19. Charting Outcomes in the Match: U.S. Allopathic Seniors (Characteristics of U.S. Allopathic  
615 Seniors Who Matched to Their Preferred Specialty in the 2018 Main Residency Match)  
616 [Internet]. [cited 2023 Sep 18]. Available from: [https://www.nrmp.org/wp-](https://www.nrmp.org/wp-content/uploads/2021/07/Charting-Outcomes-in-the-Match-2018_Seniors-1.pdf)  
617 [content/uploads/2021/07/Charting-Outcomes-in-the-Match-2018\\_Seniors-1.pdf](https://www.nrmp.org/wp-content/uploads/2021/07/Charting-Outcomes-in-the-Match-2018_Seniors-1.pdf)

618 20. Design Kit [Internet]. [cited 2023 Oct 9]. Extremes and Mainstreams. Available from:  
619 <https://www.designkit.org/methods/extremes-and-mainstreams.html>

620 21. Design Kit [Internet]. [cited 2023 Sep 18]. Create Insight Statements. Available from:  
621 <https://www.designkit.org/methods/create-insight-statements.html>

622 22. Design Kit [Internet]. [cited 2023 Oct 2]. How Might We. Available from:  
623 <https://www.designkit.org/methods/how-might-we.html>

624 23. Van T. Bui K. First-Generation College Students at a Four-Year University: Background  
625 Characteristics, Reasons for Pursuing Higher Education, and First-Year Experiences. College  
626 Student Journal. 2002 Mar;36(1):3.

- 627 24. Students & Residents [Internet]. [cited 2023 Oct 18]. You Can Afford Medical School.  
628 Available from: [https://students-residents.aamc.org/financial-aid-resources/you-can-afford-  
630 25. Medical Schools with Best Financial Aid in 2023 | BeMo® \[Internet\]. \[cited 2023 Oct 18\].  
631 Available from: \[https://bemoacademicconsulting.com/blog/medical-schools-with-best-financial-  
633 26. Hasnie A, Hasnie U, Nelson B, Aldana I, Estrada C, Williams W. Relationship Between  
634 Residency Match Distance From Medical School and Virtual Application, School  
635 Characteristics, and Specialty Competitiveness. \\*Cureus\\*. 15\\(5\\):e38782.  
636 27. Dorner FH, Burr RM, Tucker SL. The Geographic Relationships between Physicians’  
637 Residency Sites and the Locations of Their First Practices. \\*Academic Medicine\\*. 1991  
638 Sep;66\\(9\\):540.  
639 28. Fallar R, Leikauf J, Dokun O, Anand S, Gliatto P, Mellman L, et al. Medical Students’  
640 Experiences of Unplanned Leaves of Absence. \\*Med Sci Educ\\*. 2019 Aug 7;29\\(4\\):1003–11.\]\(https://bemoacademicconsulting.com/blog/medical-schools-with-best-financial-<br/>632 aid\)](https://students-residents.aamc.org/financial-aid-resources/you-can-afford-<br/>629 medical-school)

641  
642

## 643 **Supporting Information**

644 **S1 File. Interview Guide**

645 **S2 File. Codebook**

646 **S1 Table. Summary statistics of people who identified as having high debt stress (-2), vs.  
647 low debt stress (-1 or 0).**



# Students from High Debt Stress vs. Low Debt Stress Category in Each Specialty Category

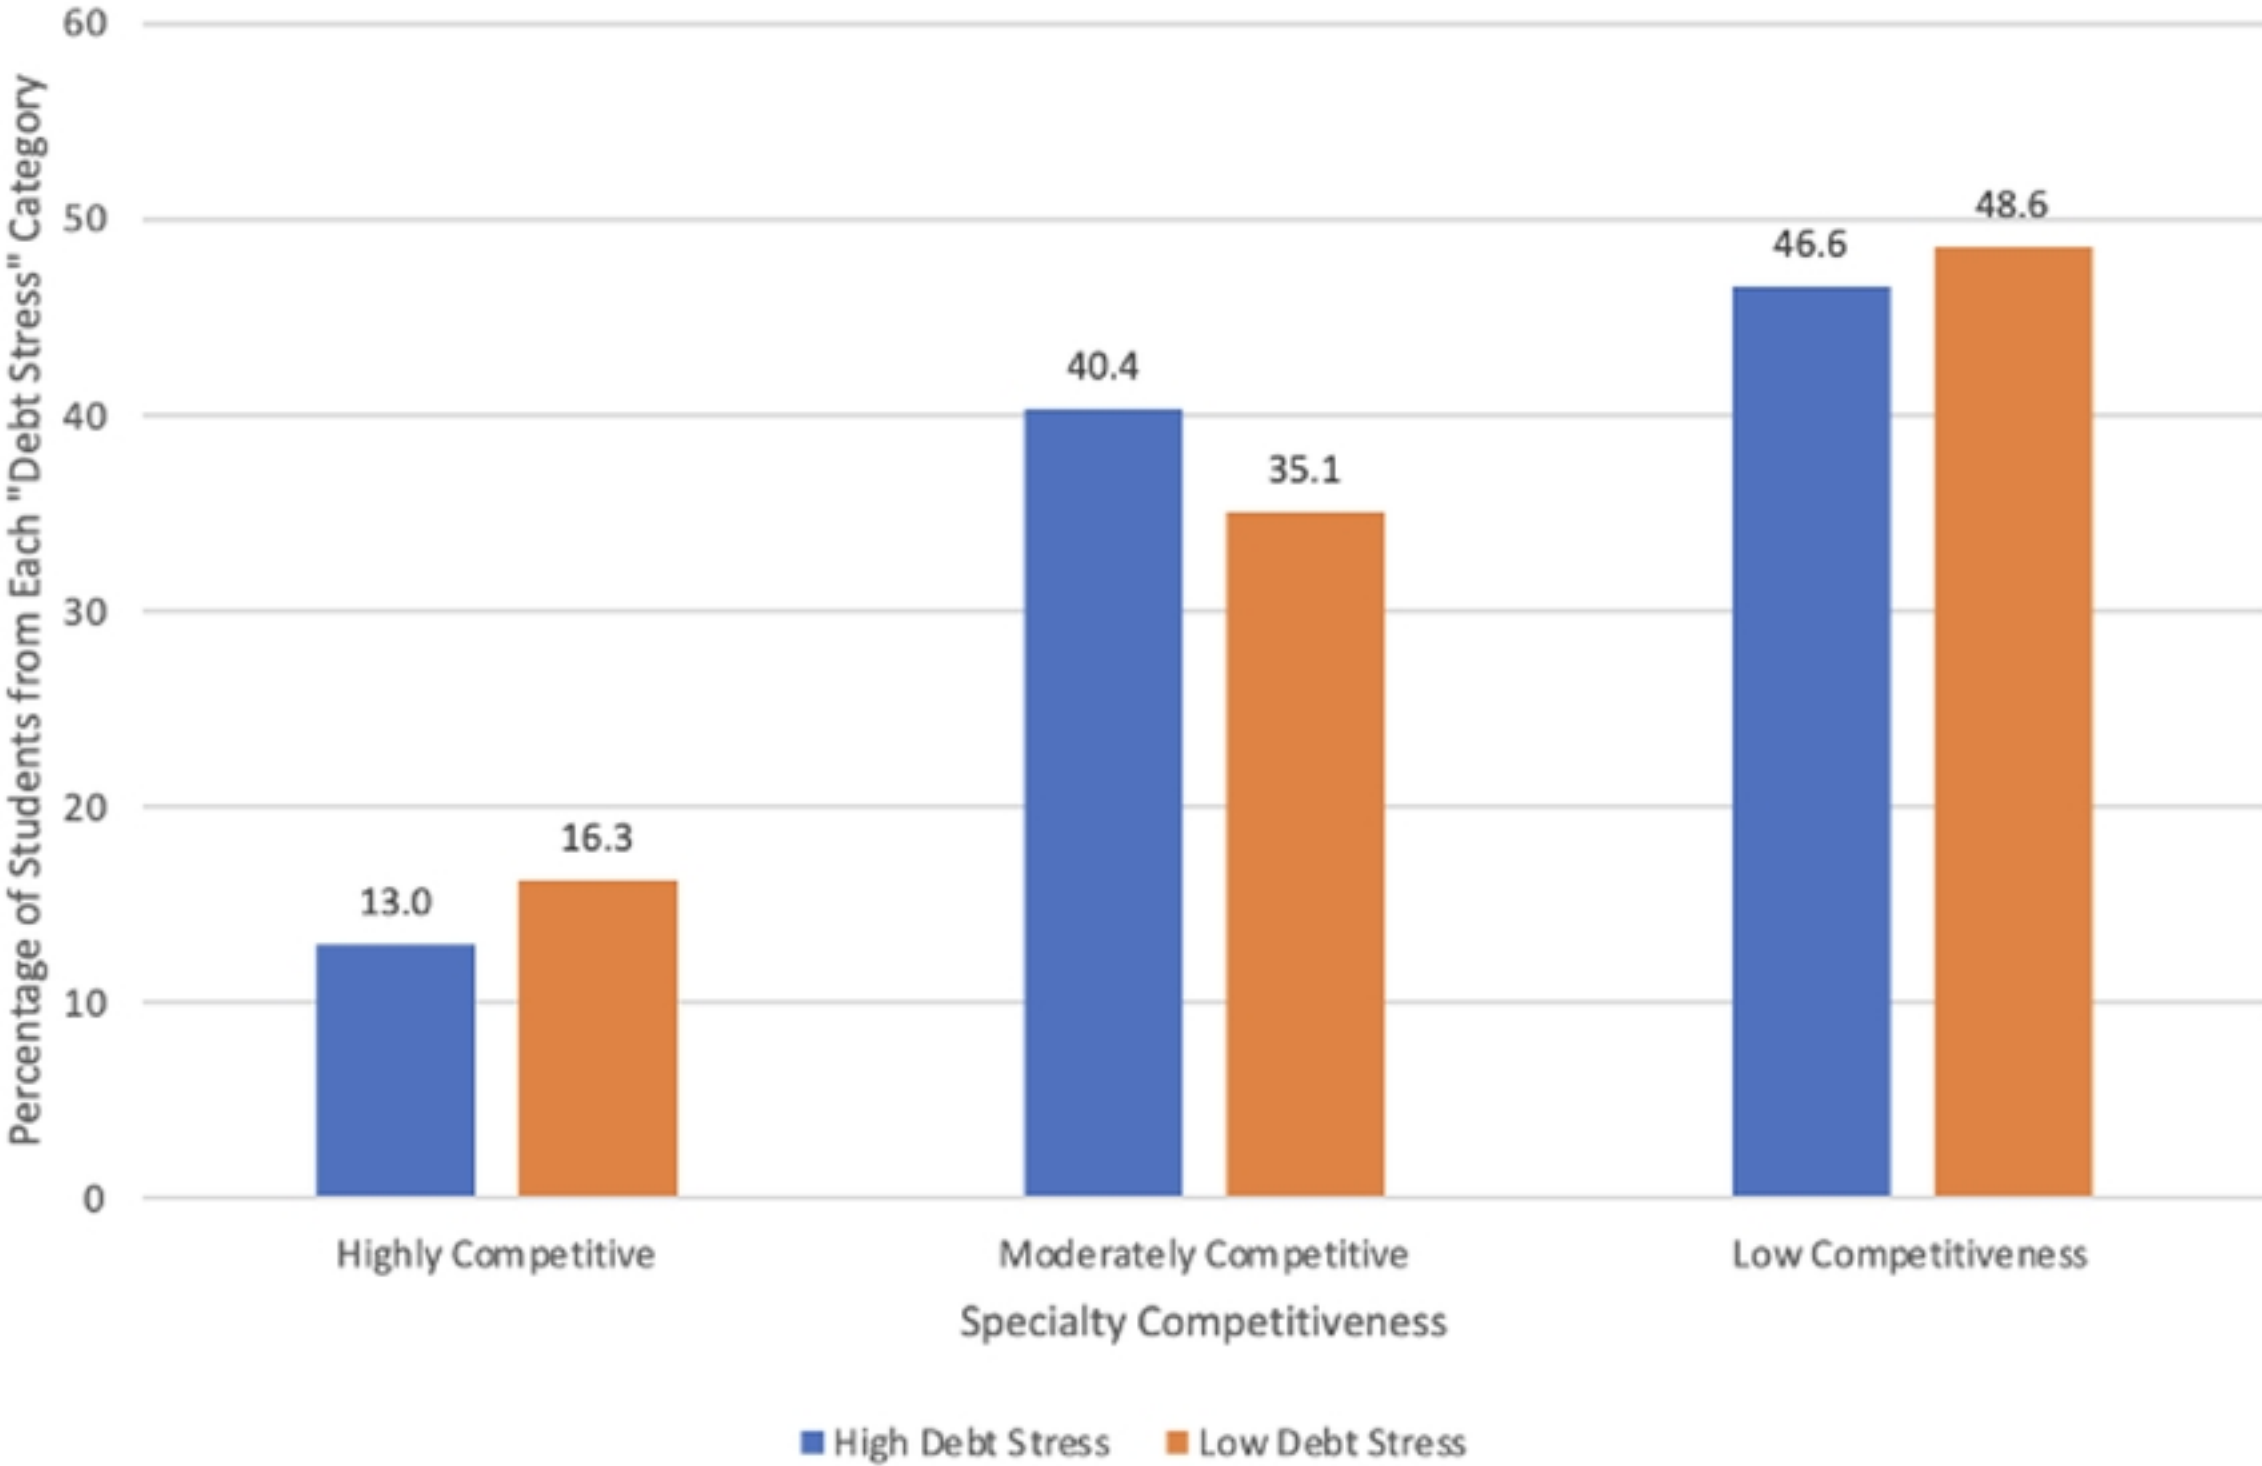

**Figure 1. Debt Stress by Specialty Competitiveness**

Students from High Debt Stress vs. Low Debt Stress Category in Each Specialty Category

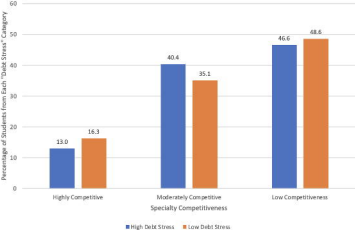

Source: https://www.medrxiv.org/content/10.1101/2024.02.05.24302356v1.full.pdf
